# Supplementary material
Source: Springer Nature journal article supplement (https://www.springermedizin.de/resource/supplementary/12984_2012_406_MOESM1_ESM.pdf/9605942)

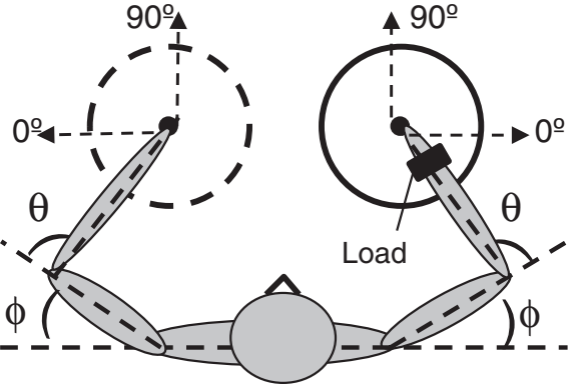

Supplement: MOESM1 [file 9605942]
